# Supplementary material
Source: PubMed Central journal article supplement (PMC4380623)
Supplement: NIHMS669361-supplement.pdf [file NIHMS669361-supplement.pdf]

## SUPPLEMENTAL MATERIALS AND METHODS

### Primer sequences for RT-PCR

**Table 1:** Custom primers were requested from Invitrogen with previously published sequences

| TARGET             | FORWARD               | REVERSE                | SOURCE                           |
|--------------------|-----------------------|------------------------|----------------------------------|
| Human SLC1A5/ASCT2 | AAGATCGTGGAGATGGAGGAT | GAACTGGAAGAGGGTCCCAAAG | <sup>1</sup>                     |
| Human Glut1        | AACTCTTCAGCCAGGGTCCAC | CACAGTGAAGATGATGAAGAC  | <sup>2</sup>                     |
| Mouse ASCT2        | TGCTTTCGGGACCTCTTCTA  | TGATGTGTTTGGCCACACCA   | <sup>3</sup>                     |
| Mouse Glut1        | GCCCCAGAAGGTTATTGA    | CGTGGTGA GTGTGGTGGAT   | <sup>4</sup>                     |
| Human 18S RNA      | CAGCCACCCGAGATTGAGCA  | TAGTAGCGACGGGGCGGTGTG  | ShineGene Molecular Biotech Inc. |
| Mouse 18S RNA      | AGGGGAGAGCGGGTAAGAGA  | GGACAGGACTAGGCGGAACA   | ShineGene Molecular Biotech Inc. |

1. Averous J, Bruhat A, Jousse C, Carraro V, Thiel G, Fafournoux P. Induction of CHOP expression by amino acid limitation requires both ATF4 expression and ATF2 phosphorylation. *J. Biol. Chem.* 2004;279(7):5288-97. doi:10.1074/jbc.M311862200.
2. Amann T, Maegdefrau U, Hartmann A, et al. GLUT1 expression is increased in hepatocellular carcinoma and promotes tumorigenesis. *Am. J. Pathol.* 2009;174(4):1544-52. doi:10.2353/ajpath.2009.080596.
3. Nakaya M, Xiao Y, Zhou X, et al. Inflammatory T cell responses rely on amino acid transporter ASCT2 facilitation of glutamine uptake and mTORC1 kinase activation. *Immunity* 2014;40(5):692-705. doi:10.1016/j.immuni.2014.04.007.
4. Ge X, Chen C, Hui X, Wang Y, Lam KSL, Xu A. Fibroblast growth factor 21 induces glucose transporter-1 expression through activation of the serum response factor/Ets-like protein-1 in adipocytes. *J. Biol. Chem.* 2011;286(40):34533-41. doi:10.1074/jbc.M111.248591.

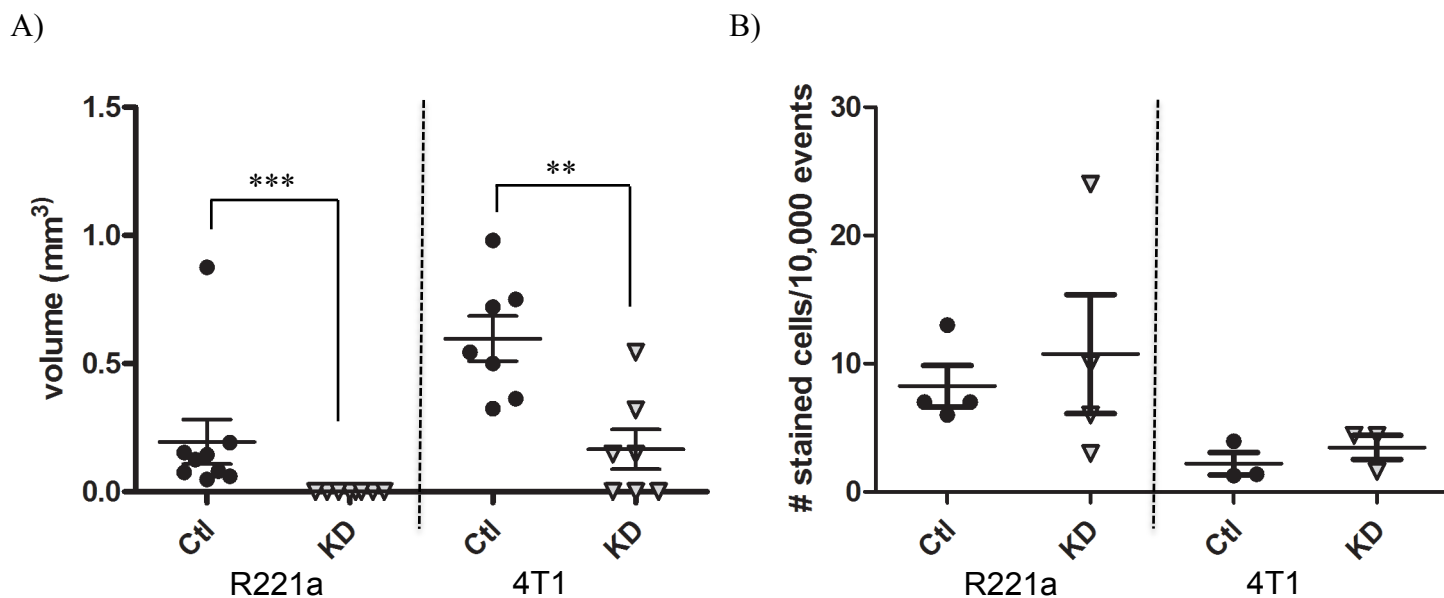

**Supplemental Figure 1: A reduction in initial survival ability does not contribute to the reduction in IL4R $\alpha$  tumor volume at endpoint.** R221a or 4T1 sh-control (Ctl) or IL4R $\alpha$  knockdown (KD) cells were orthotopically injected into the 4<sup>th</sup> mammary gland of mice. **A)** R221a and 4T1 mammary tumor volume at endpoint, as calculated from caliper measurements of tumor length and width (n = 14-16). **B)** Quantification by flow cytometry of the number of cell tracker red positive tumor cells in the mammary glands of mice 48 hours post-injection (n = 6-8).

A)

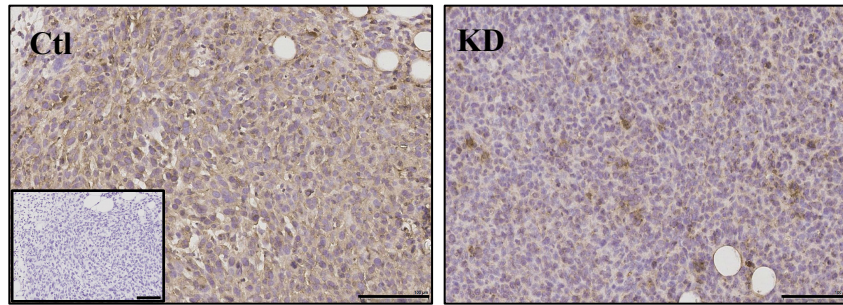

B)

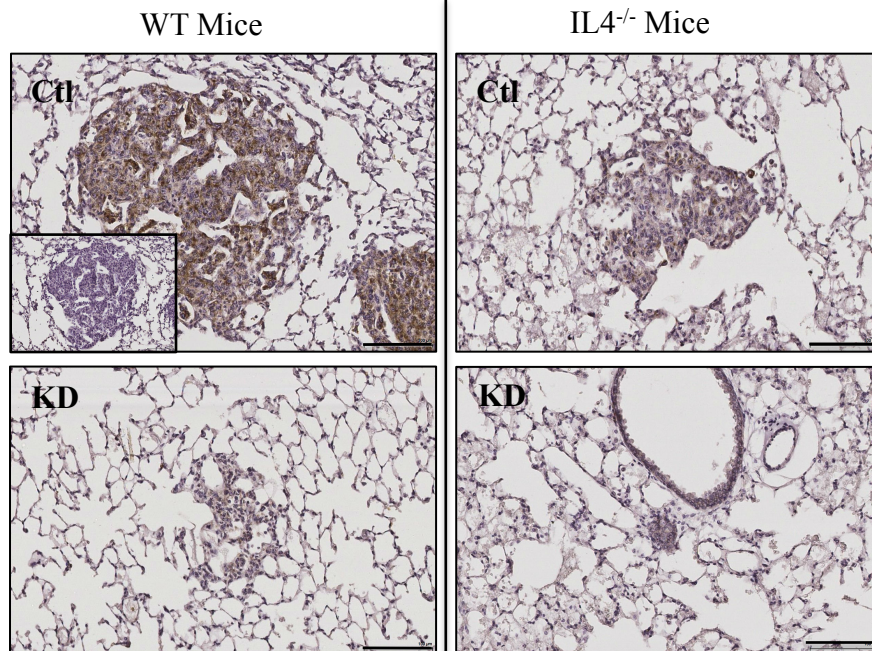

**Supplemental Figure 2: Immunohistochemical analysis of GLUT1 protein expression in 4T1 tumors. A)** Representative images of GLUT1 staining by immunohistochemistry in 4T1 sh-control (Ctl) and IL4R $\alpha$  knockdown (KD) orthotopic mammary tumors and **B)** lung tumor metastases in wild-type (WT) or IL4 knockout (IL4<sup>-/-</sup>) mice. Examples of negative staining controls are shown inset, and all scale bars = 100  $\mu$ M.

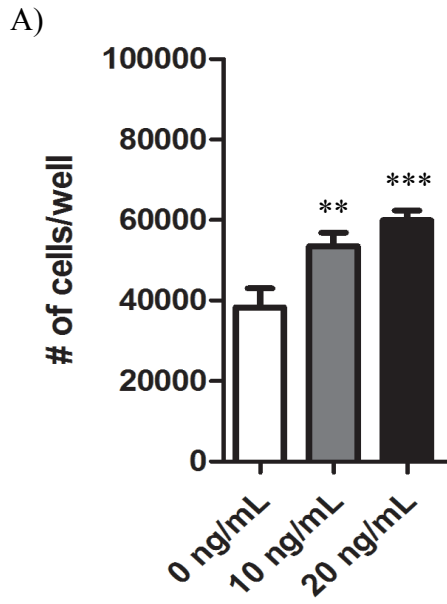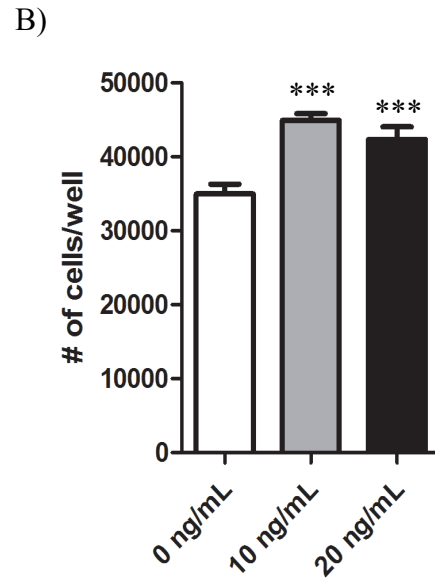

**Supplemental Figure 3: IL4 stimulates growth in human and murine breast cancer cells. A) 4T1 or B) MDA-MB-231 parental cells were treated with recombinant IL4 for 48 hours and cell number determined by CyQUANT® proliferation assay.**

A)

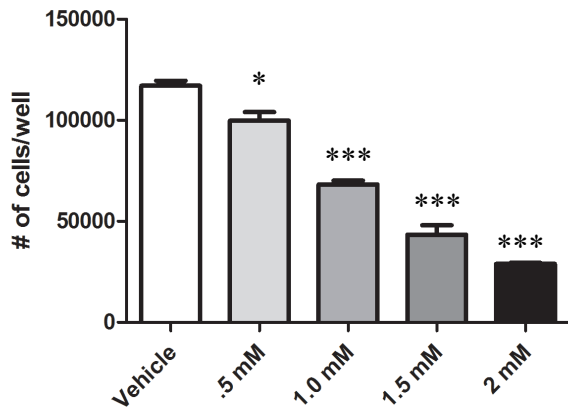

B)

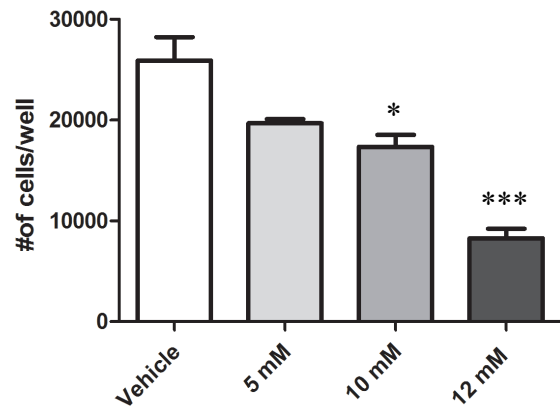

C)

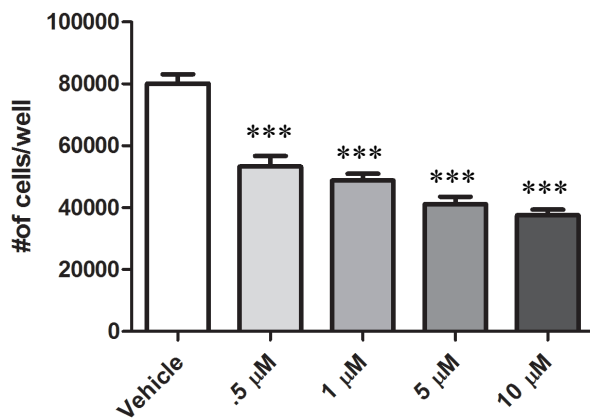

D)

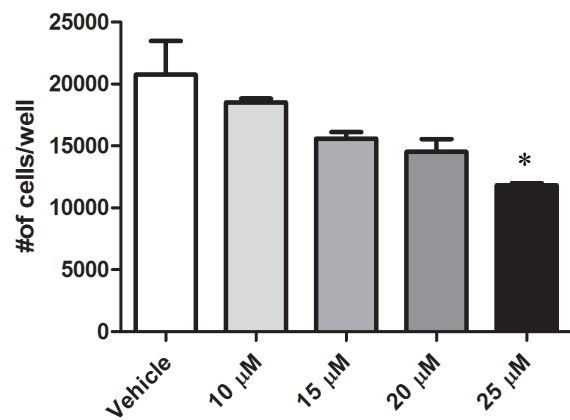

**Supplemental Figure 4: 2 Deoxy-D-glucose (2DG) and compound 968 attenuate human and murine breast cancer cell growth in a dose dependent manner.** A) 4T1 and B) MDA MB 231 sh-control clones were treated once with increasing doses of 2DG and cell number quantified 48 hours later by CyQUANT® proliferation assay. C) 4T1 and D) MDA MB 231 sh-control clones were treated once with increasing doses of 968 and cell number quantified 48 hours later by CyQUANT®.

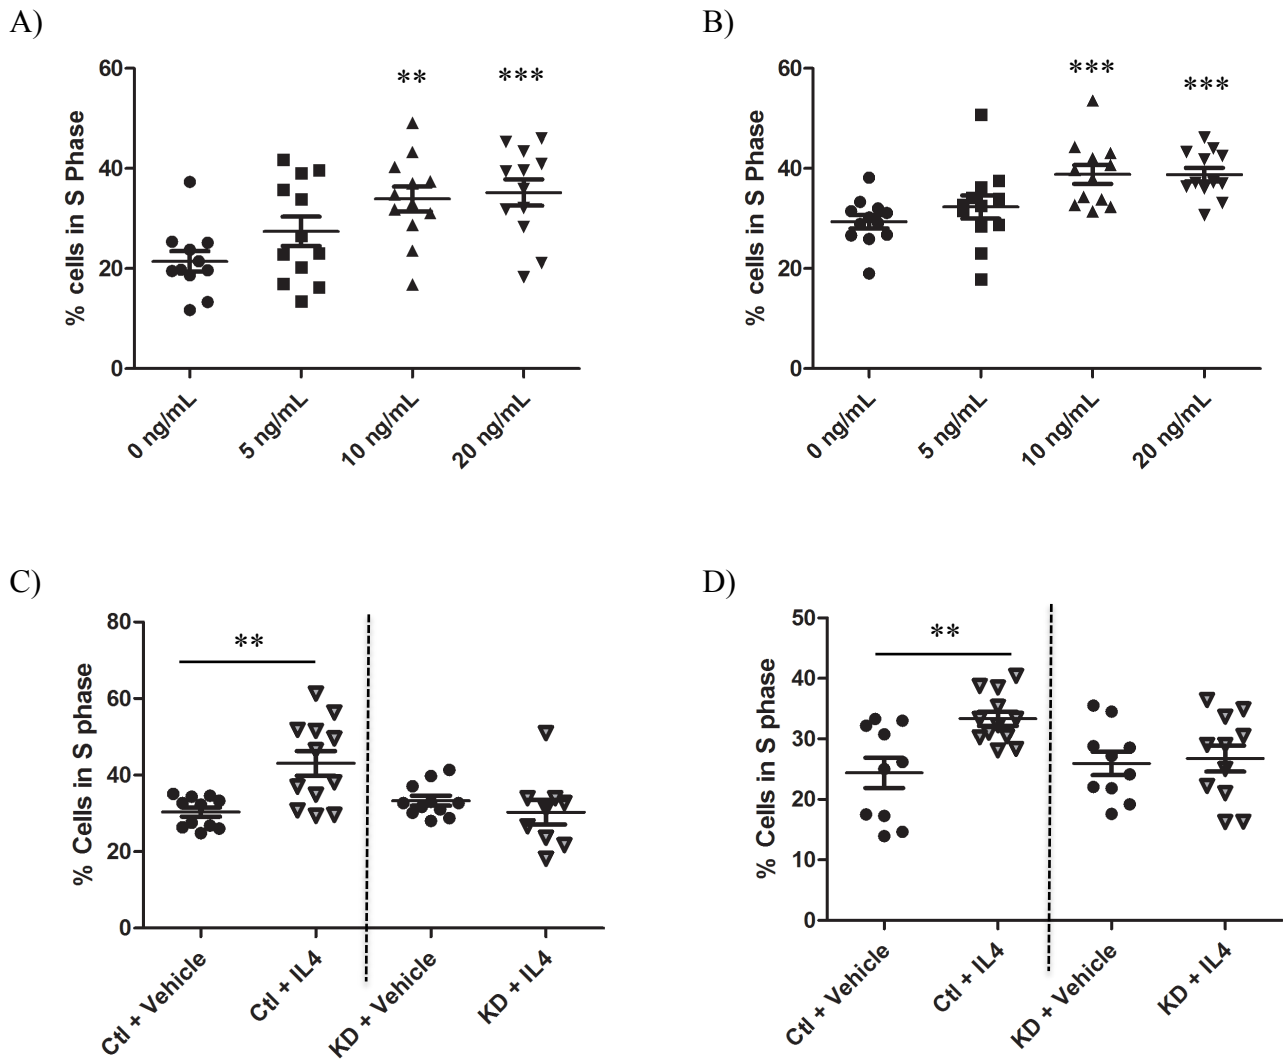

**Supplemental Figure 5: IL4R $\alpha$  mediates enhanced proliferation in response to IL4 in Human and murine breast cancer cells.** The percent of **A)** 4T1 parental cells and **B)** MDA MB 231 parental cells in S phase was quantified by EDU incorporation assay following 48 hours incubation with increasing doses of IL4. **C)** 4T1 and **B)** MDA MB 231 sh-control and IL4R $\alpha$  KD cells were treated with 10 ng/mL IL4 for 48 hours before the percent cells in S phase was quantified using an EdU incorporation assay.
